# Supplementary material for: Time-Warp–Invariant Neuronal Processing
Source: PubMed Central journal article supplement (PMC2701607; doi:10.1371/journal.pbio.1000141), 2009-07-07
Supplement: pbio.1000141.s002.pdf [file pbio.1000141.s002.pdf]

| Number of errors    | 0     | 1     | 2     | 3     | 4     | 5    | 6    | 7    | 8    | 9    | 10 |
|---------------------|-------|-------|-------|-------|-------|------|------|------|------|------|----|
| Overall             | 23.11 | 27.11 | 18.67 | 12.89 | 11.56 | 3.11 | 1.78 | 0.44 | 0.89 | 0.44 | 0  |
| Eastern New England | 30    | 20    | 20    | 0     | 20    | 10   | 0    | 0    | 0    | 0    | 0  |
| Virginia Piedmont   | 30    | 40    | 10    | 20    | 0     | 0    | 0    | 0    | 0    | 0    | 0  |
| Southwest           | 40    | 30    | 20    | 10    | 0     | 0    | 0    | 0    | 0    | 0    | 0  |
| Southern California | 40    | 0     | 20    | 20    | 10    | 0    | 10   | 0    | 0    | 0    | 0  |
| South Midland       | 10    | 30    | 20    | 20    | 20    | 0    | 0    | 0    | 0    | 0    | 0  |
| Central New York    | 33.33 | 33.33 | 8.33  | 16.67 | 0     | 0    | 8.33 | 0    | 0    | 0    | 0  |
| Rocky Mountains     | 40    | 40    | 20    | 0     | 0     | 0    | 0    | 0    | 0    | 0    | 0  |
| North Central       | 30    | 40    | 20    | 10    | 0     | 0    | 0    | 0    | 0    | 0    | 0  |
| Delaware Valley     | 27.27 | 27.27 | 18.18 | 18.18 | 0     | 0    | 0    | 0    | 9.09 | 0    | 0  |
| Midland             | 10    | 30    | 10    | 30    | 10    | 10   | 0    | 0    | 0    | 0    | 0  |
| North Central       | 20    | 30    | 30    | 10    | 10    | 0    | 0    | 0    | 0    | 0    | 0  |
| South Carolina      | 10    | 30    | 20    | 10    | 10    | 10   | 0    | 10   | 0    | 0    | 0  |
| Gulf South          | 30    | 10    | 20    | 20    | 0     | 10   | 10   | 0    | 0    | 0    | 0  |
| South Midland       | 10    | 40    | 40    | 0     | 0     | 10   | 0    | 0    | 0    | 0    | 0  |
| Gulf South          | 10    | 10    | 20    | 10    | 30    | 10   | 0    | 0    | 0    | 10   | 0  |
| Spanish American    | 20    | 40    | 20    | 0     | 20    | 0    | 0    | 0    | 0    | 0    | 0  |
| Southwest           | 40    | 10    | 20    | 10    | 10    | 0    | 10   | 0    | 0    | 0    | 0  |
| New York City       | 0     | 30    | 10    | 20    | 30    | 0    | 0    | 0    | 10   | 0    | 0  |
| South Midland       | 36.36 | 45.45 | 0     | 18.18 | 0     | 0    | 0    | 0    | 0    | 0    | 0  |
| Pacific Northwest   | 30    | 30    | 20    | 20    | 0     | 0    | 0    | 0    | 0    | 0    | 0  |
| Upper Ohio Valley   | 0     | 30    | 10    | 10    | 50    | 0    | 0    | 0    | 0    | 0    | 0  |
| African American    | 9.09  | 0     | 36.36 | 9.09  | 36.36 | 9.09 | 0    | 0    | 0    | 0    | 0  |

Table S1: Generalization from TI46 to TIDIGITS. For each dialect group the table lists the percentages of speakers for which our model committed a given number of word recognition errors.
